# Supplementary material for: Multi-Omics Analysis Reveals Aberrant Gut-Metabolome-Immune Network in Schizophrenia
Source: PubMed Central journal article supplement (PMC8927969; doi:10.3389/fimmu.2022.812293), 2022-03-03
Supplement: Image_2.pdf [file Image_2.pdf]

A

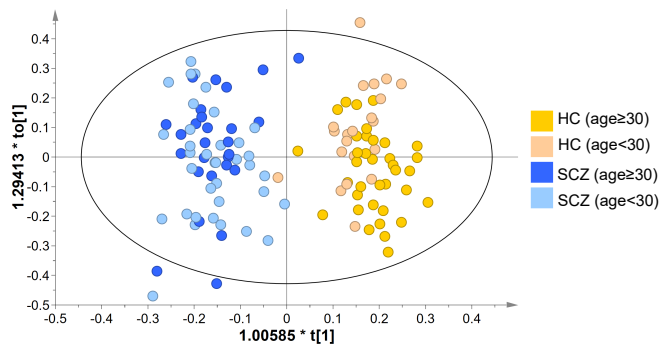

B

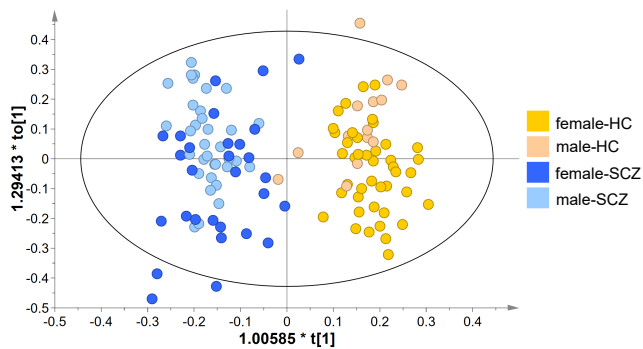

C

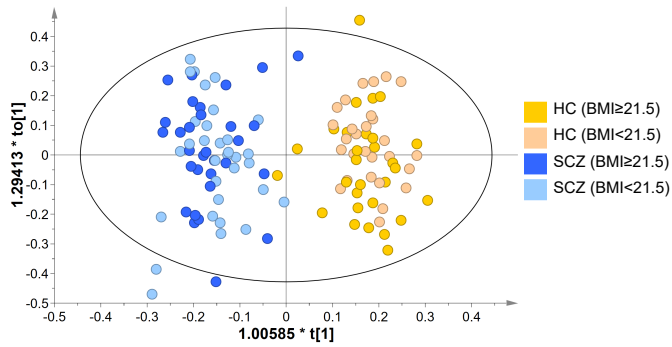

SCZ trend

Up in HC  
Up in SCZ

+ FDR < 0.05  
\* FDR < 0.01

Class

Alkaloids and derivatives  
Benzenoids  
Lipids and lipid-like molecules  
Nucleosides, nucleotides, and analogues  
Organic acids and derivatives  
Organic nitrogen compounds  
Organic oxygen compounds  
Organoheterocyclic compounds

Spearman correlation coefficient (cc)

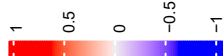

D

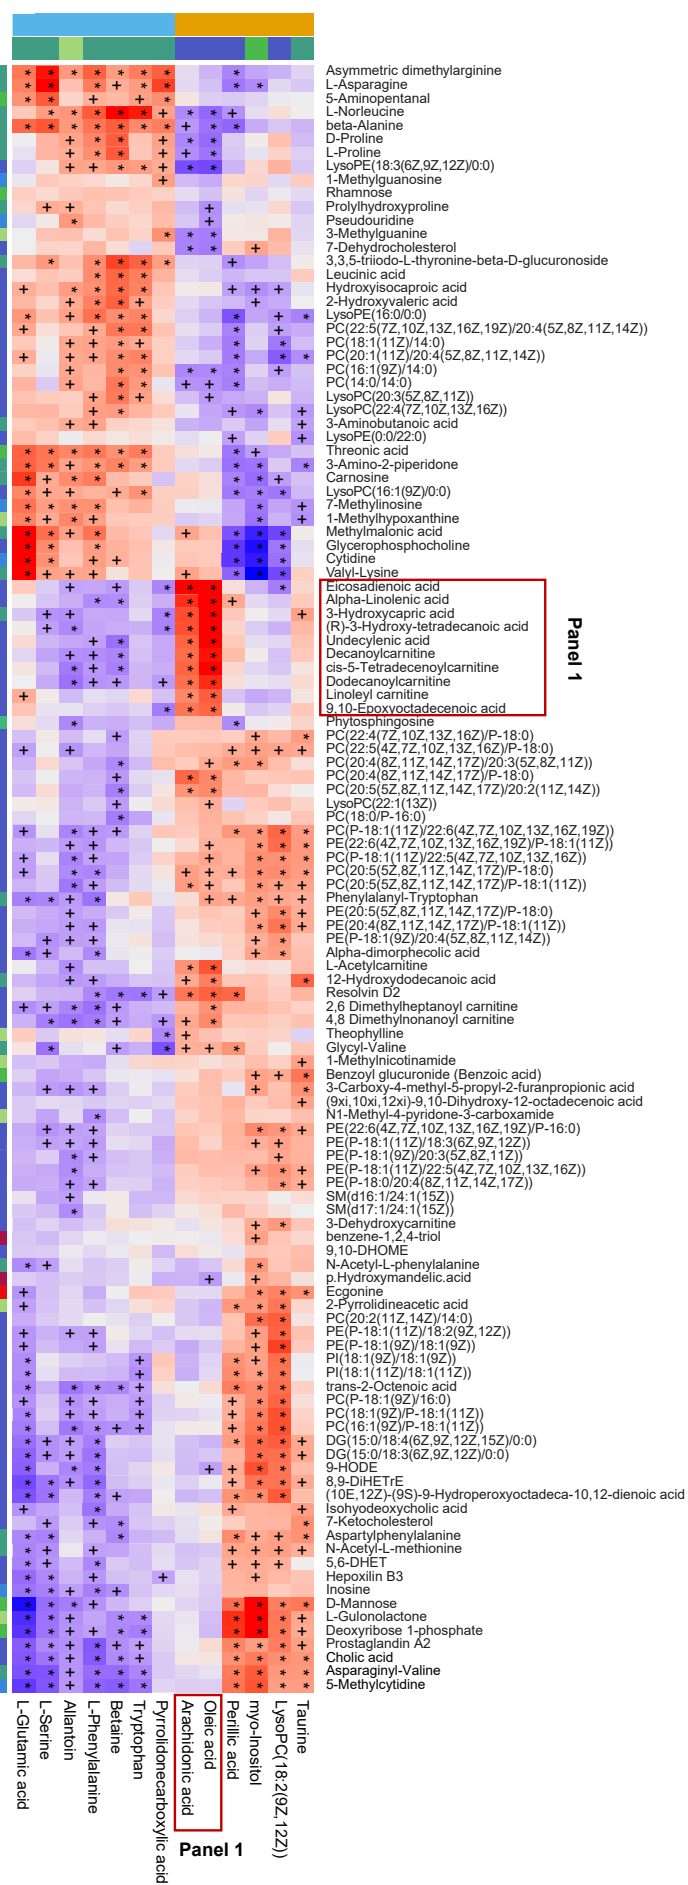

Panel 1

Panel 1
