# Supplementary material for: Multi-Omics Analysis Reveals Aberrant Gut-Metabolome-Immune Network in Schizophrenia
Source: PubMed Central journal article supplement (PMC8927969; doi:10.3389/fimmu.2022.812293), 2022-03-03

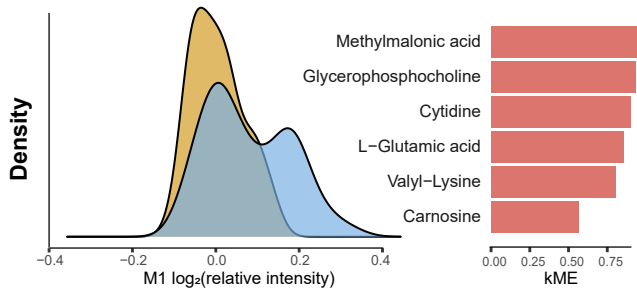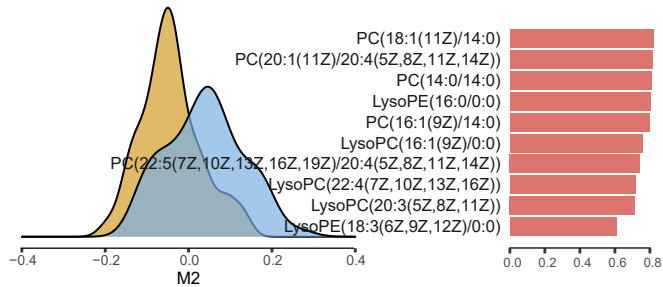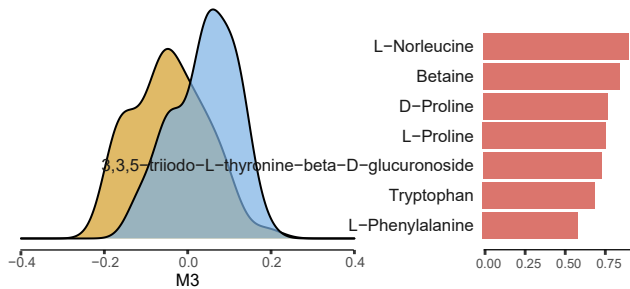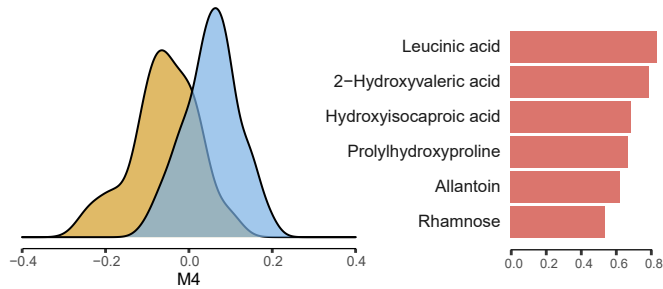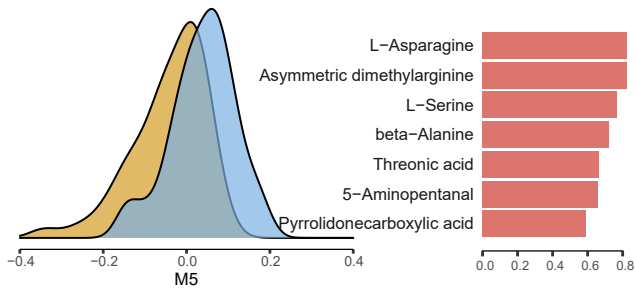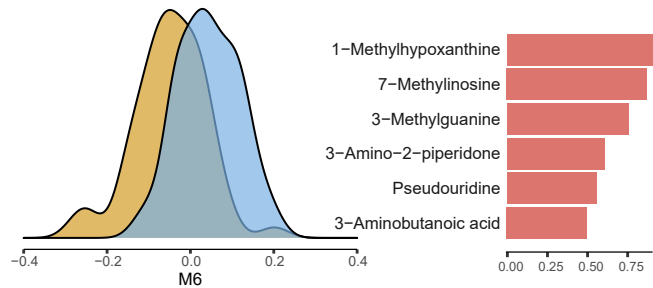

Supplement: Image_4.pdf [file Image_4.pdf]
