# Supplementary material for: Multi-Omics Analysis Reveals Aberrant Gut-Metabolome-Immune Network in Schizophrenia
Source: PubMed Central journal article supplement (PMC8927969; doi:10.3389/fimmu.2022.812293), 2022-03-03
Supplement: Image_6.pdf [file Image_6.pdf]

## Healthy controls-enriched mOTUs

## Schizophrenic patients-enriched mOTUs

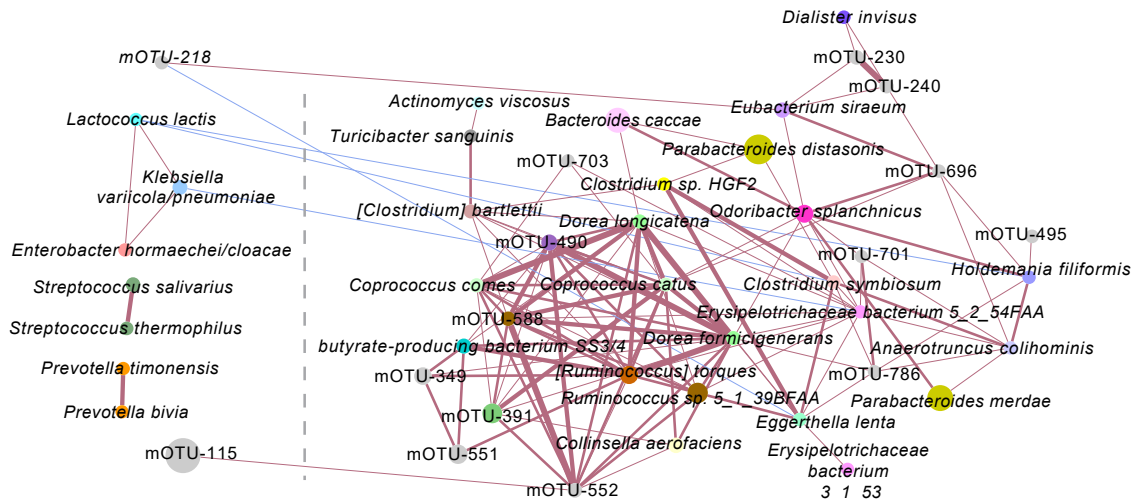

### Spearman correlation coefficient(cc)

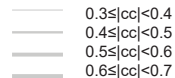

— Negative  
 — Positive

### Actinobacteria

● *Actinomyces*  
 ● *Collinsella*  
 ● *Eggerthella*

### Bacteroidetes

● *Bacteroides*  
 ● *Odoribacter*  
 ● *Parabacteroides*  
 ● *Prevotella*

### Firmicutes

● *Anaerotruncus*  
 ● *Clostridium*  
 ● *Blautia*  
 ● *Coprobacillus*  
 ● *Coprococcus*  
 ● *Dorea*  
 ● *Eubacterium*  
 ● *Holdemania*  
 ● *Lactococcus*  
 ● *Ruminococcus*  
 ● *Streptococcus*  
 ● *Subdoligranulum*  
 ● *Turicibacter*  
 ● *undef*

### Proteobacteria

● *Enterobacter*  
 ● *Klebsiella*  
 ● *Unclassified*  
 ● *butyrate-producing\_bacterium*  
 ● *Erysipelotrichaceae\_bacterium*  
 ● *Unclassified mOTU*
