# Supplementary material for: Multi-Omics Analysis Reveals Aberrant Gut-Metabolome-Immune Network in Schizophrenia
Source: PubMed Central journal article supplement (PMC8927969; doi:10.3389/fimmu.2022.812293), 2022-03-03

**A**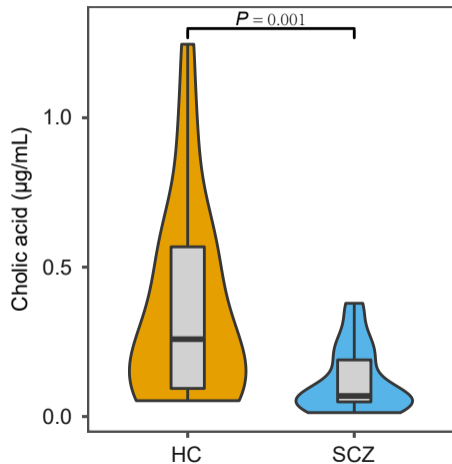**B**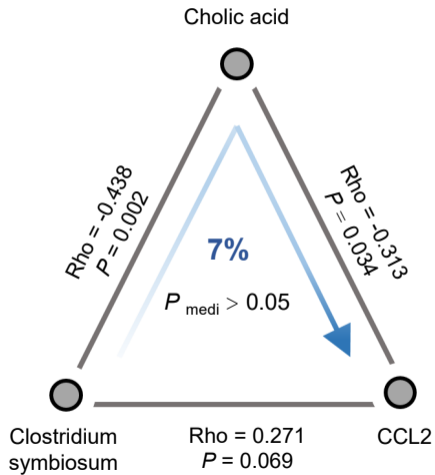**C**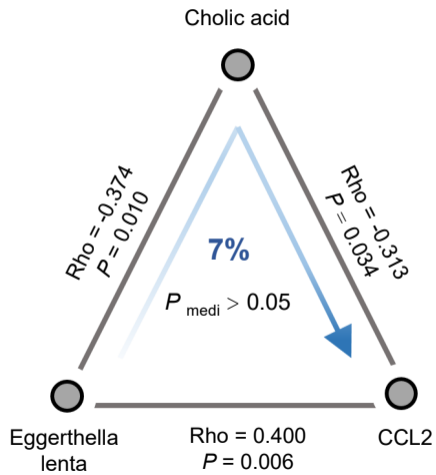

Supplement: Image_7.pdf [file Image_7.pdf]
